# Supplementary material for: Highly efficient synthesis of LTA-type aluminophosphate molecular sieve by improved ionothermal method
Source: Royal Society of Chemistry journal article supplement (doi:10.1039/c5nj03006d), 2016-01-01
Supplement: c5nj03006d1.pdf [file c5nj03006d1.pdf]

Supplementary Information for New Journal of Chemistry

## Highly efficient synthesis of LTA-type aluminophosphate molecular sieve by improved ionothermal method

Xinhong Zhao<sup>1</sup>, Jiangbo Zhao<sup>1</sup>, Chang-Yang Chiang<sup>2</sup>, Zhengshan Li<sup>1</sup>, Yu Zhao<sup>1</sup>, Wuzong Zhou<sup>2</sup>

<sup>1</sup>*School of Petrochemical Engineering, Lanzhou University of Technology, Lanzhou 730050, China*

<sup>2</sup>*EaStChem, School of Chemistry, University of St Andrews, St Andrews, KY16 9ST, United Kingdom*

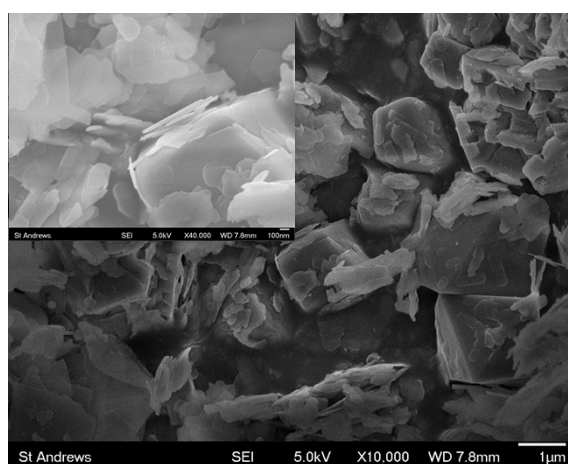

Fig. S1 SEM images of the as-synthesized sample Morp-0

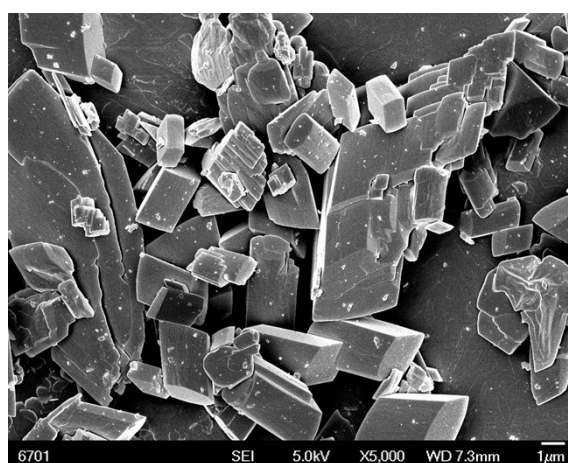

Fig. S2 SEM image of the as-synthesized sample ILs-2

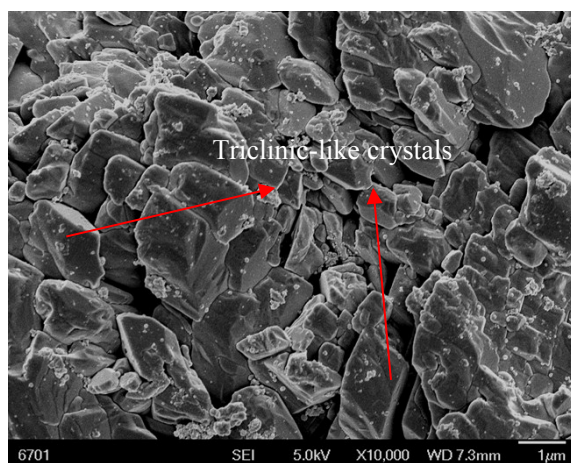

Fig. S3 SEM image of the as-synthesized sample ILs-0

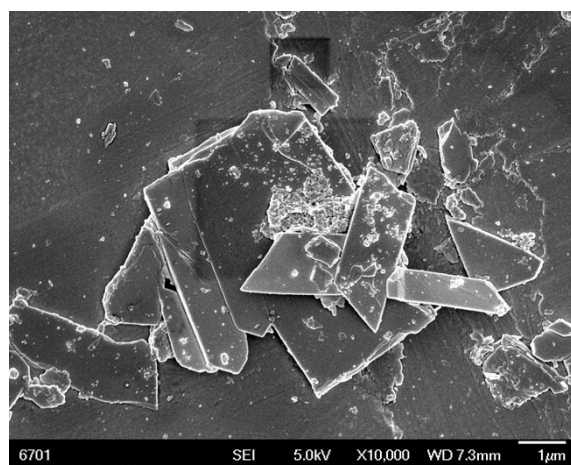

Fig. S4 SEM image of the as-synthesized sample ILs-1

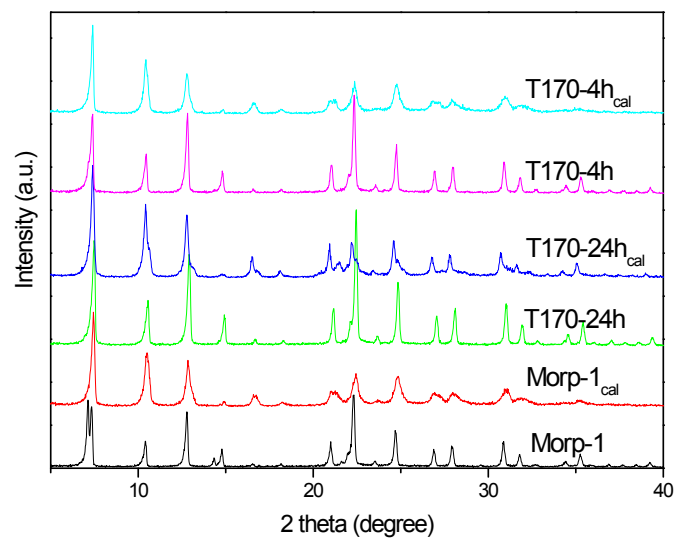

Fig. S5 XRD patterns of three calcined samples (T170-4h<sub>cal</sub>, T170-24h<sub>cal</sub> and Morp-1<sub>cal</sub>) together with the corresponding as-synthesized samples as references.
